# Supplementary material
Source: PubMed Central journal article supplement (PMC441546)

A

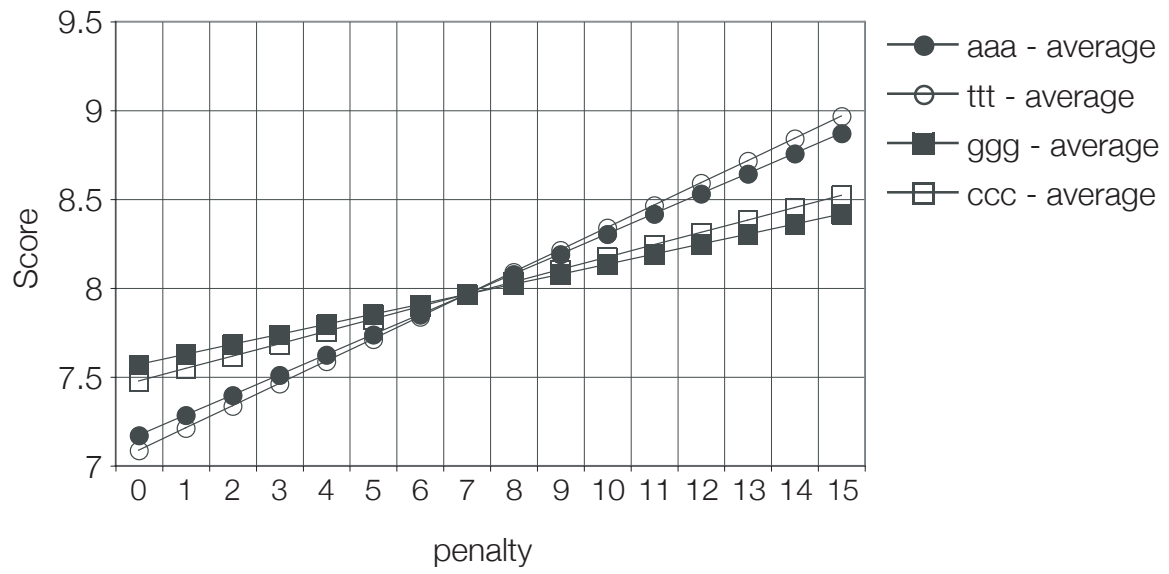

B

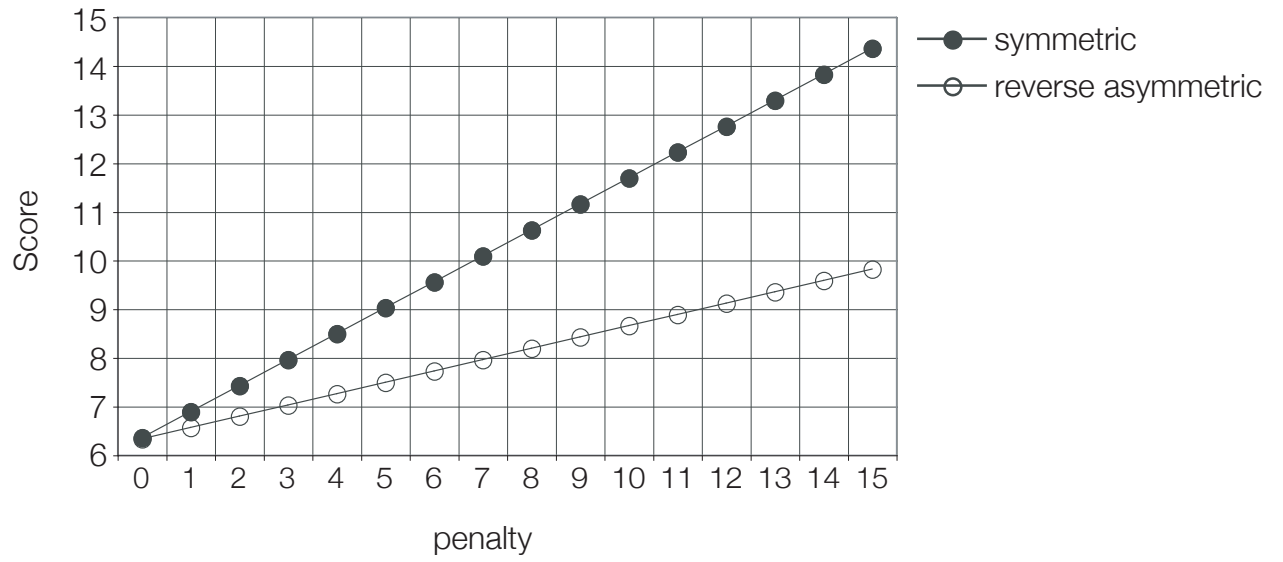

Supplement: nar_32_suppl-2_W113__1.pdf [file nar_32_suppl-2_W113__1.pdf]

C

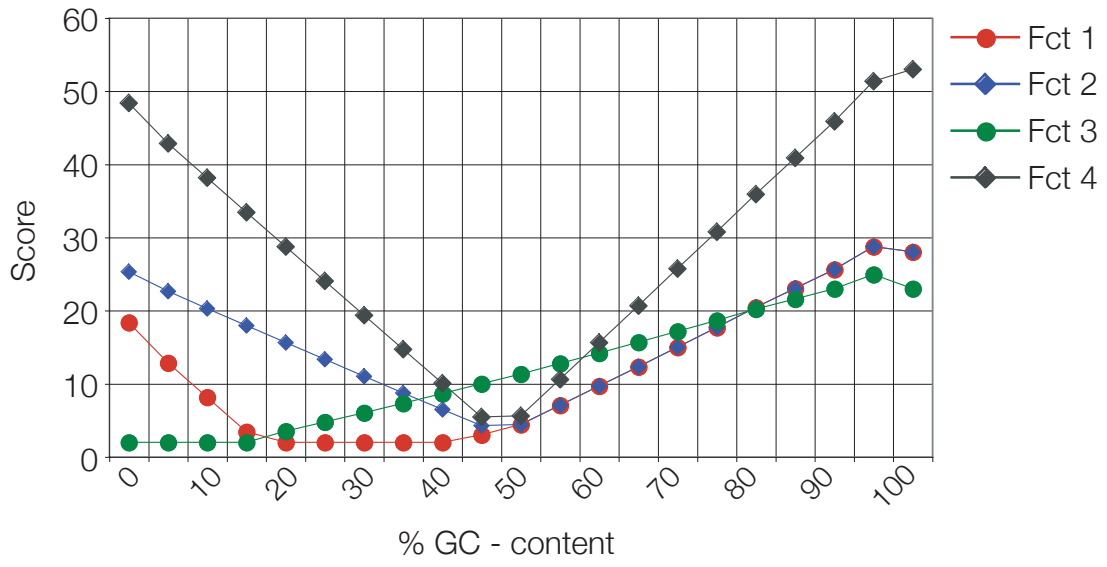

D

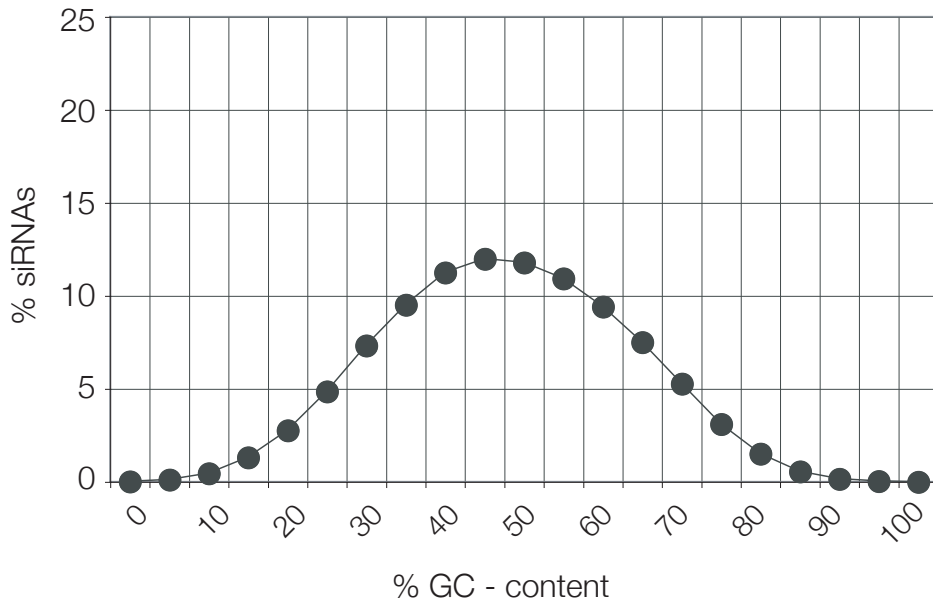

Supplement: nar_32_suppl-2_W113__2.pdf [file nar_32_suppl-2_W113__2.pdf]

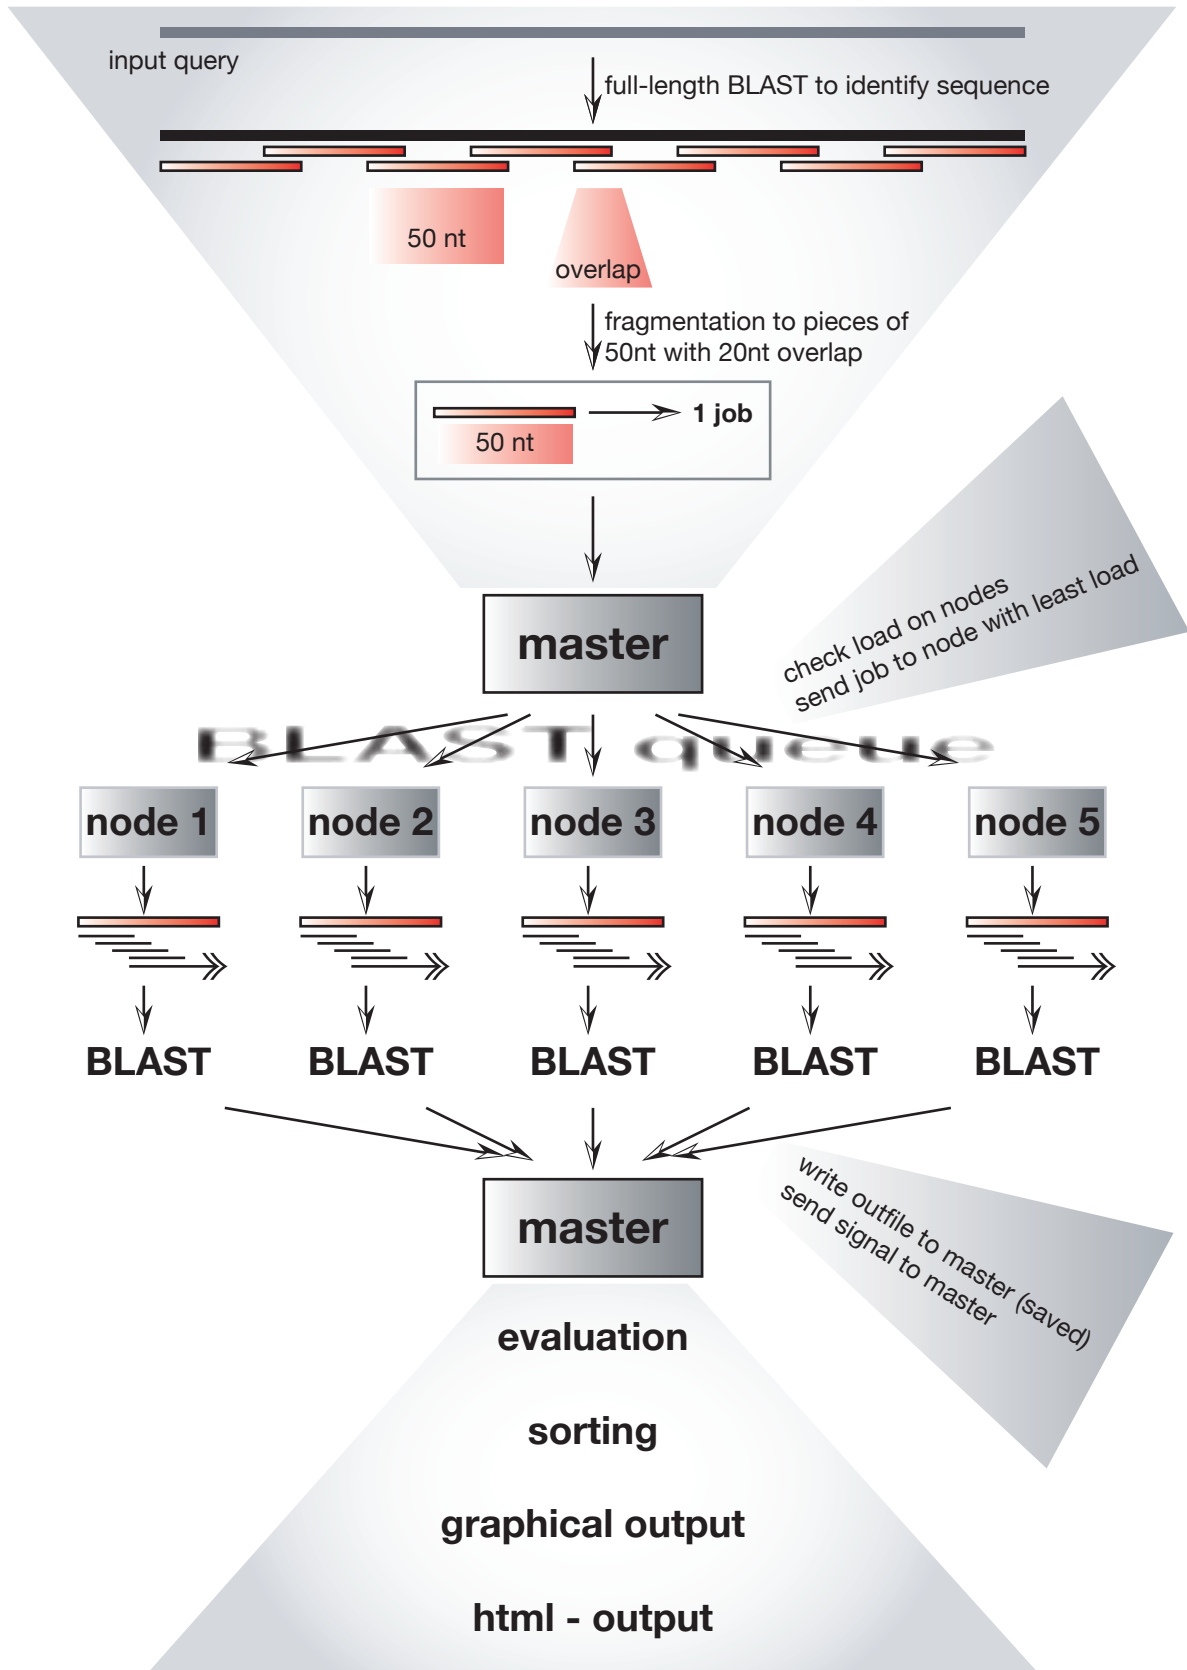

Supplement: nar_32_suppl-2_W113__3.pdf [file nar_32_suppl-2_W113__3.pdf]

A

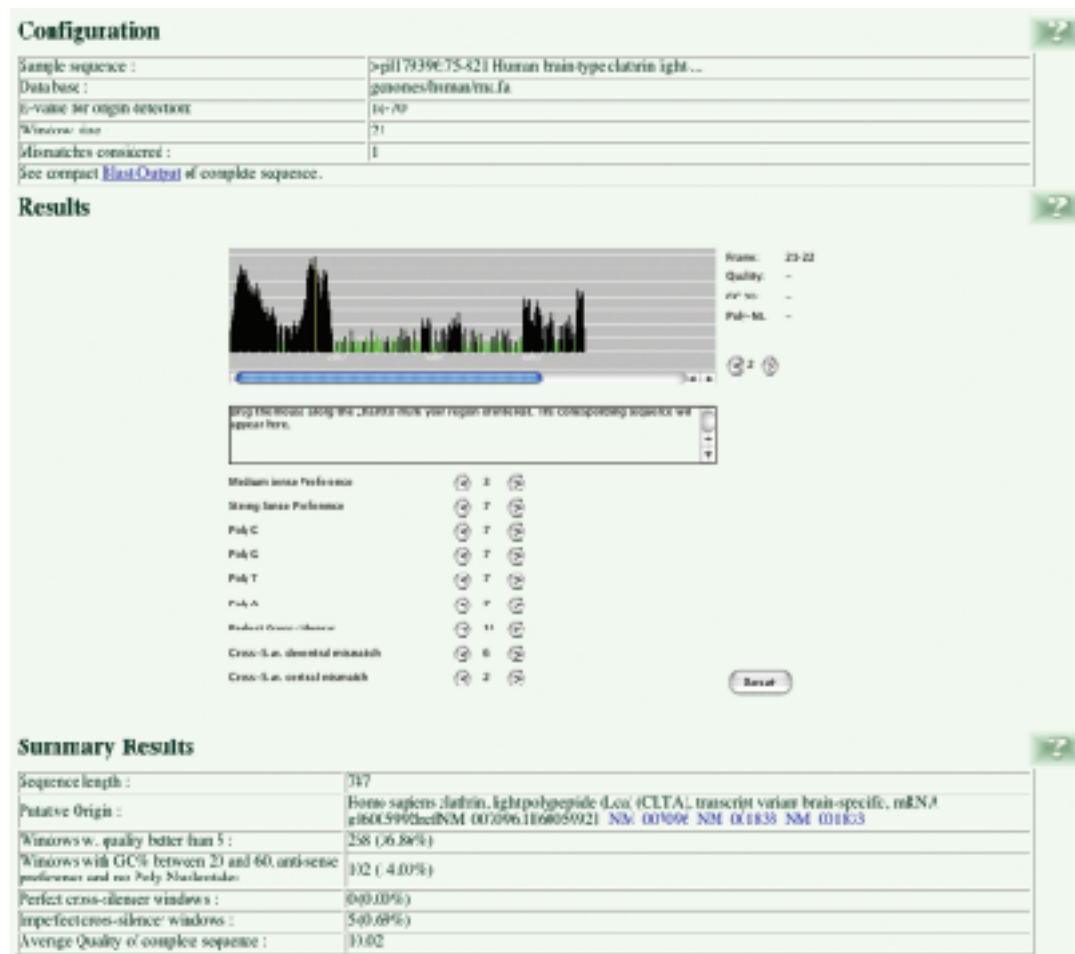

B

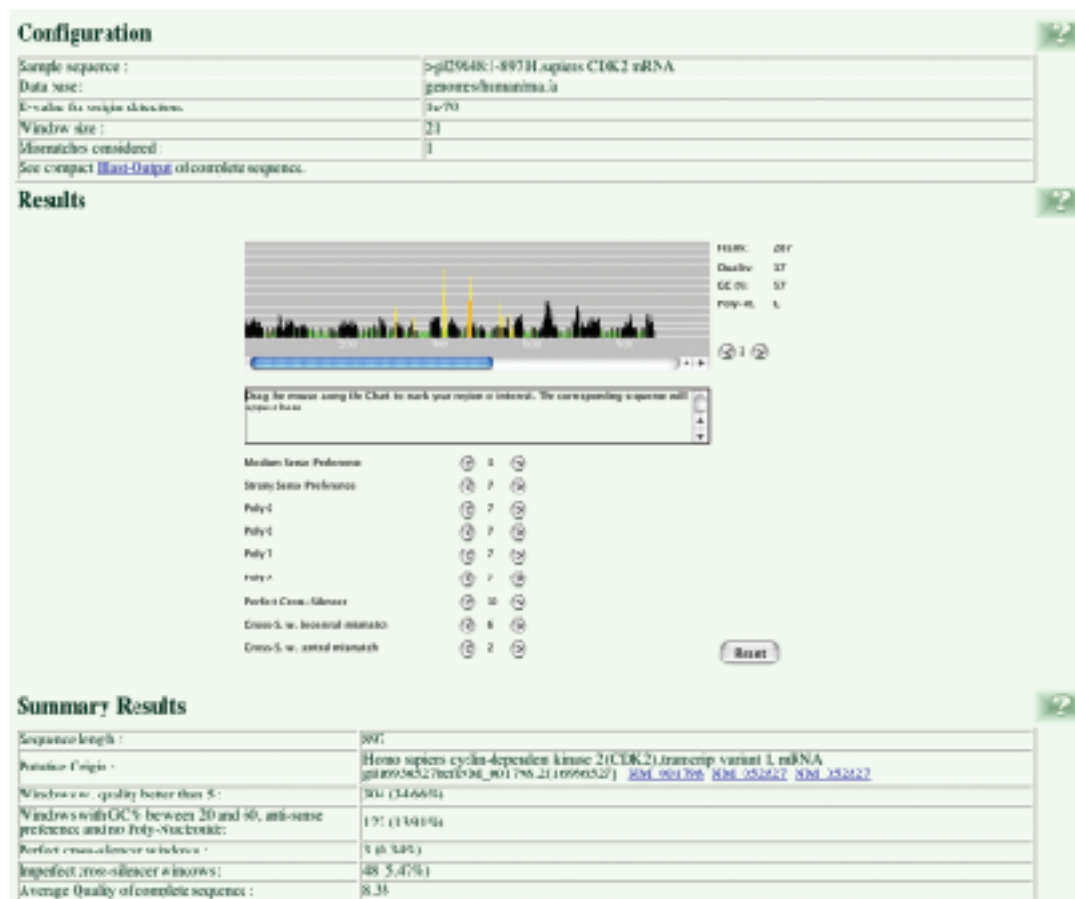

Supplement: nar_32_suppl-2_W113__4.pdf [file nar_32_suppl-2_W113__4.pdf]

C

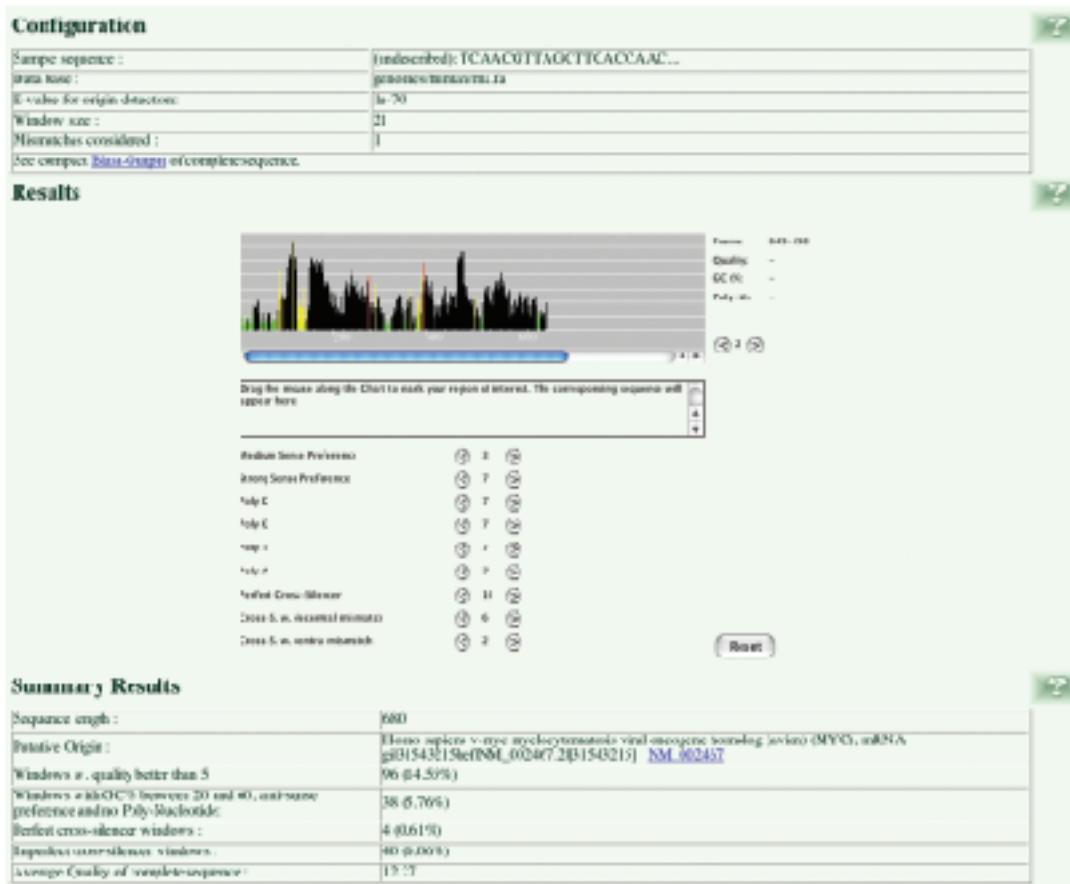

Supplement: nar_32_suppl-2_W113__5.pdf [file nar_32_suppl-2_W113__5.pdf]
